# Supplementary material for: Effect of Empagliflozin and Dapagliflozin on Ambulatory Arterial Stiffness in Patients with Type 2 Diabetes Mellitus and Cardiovascular Co-Morbidities: A Prospective, Observational Study
Source: MDPI journal article supplement (doi:10.3390/medicina58091167), 2022-08-27
Supplement: s1 [file s1]

**Online supplementary Table S2** Change in ambulatory arterial stiffness indices with empagliflozin compared to dapagliflozin.

| Change in arterial stiffness parameter | Empagliflozin vs. dapagliflozin | p-value |
|----------------------------------------|---------------------------------|---------|
| $\Delta$ 24-h PWV (m/s)                | -0.085                          | 0.19    |
| $\Delta$ daytime PWV (m/s)             | -0.07                           | 0.27    |
| $\Delta$ nighttime PWV (m/s)           | -0.085                          | 0.09    |
| $\Delta$ Aix (%)                       | 0.57                            | 0.074   |
| $\Delta$ cPP (mm Hg)                   | -4.71                           | 0.26    |
