# Supplementary material for: Effect of Empagliflozin and Dapagliflozin on Ambulatory Arterial Stiffness in Patients with Type 2 Diabetes Mellitus and Cardiovascular Co-Morbidities: A Prospective, Observational Study
Source: MDPI journal article supplement (doi:10.3390/medicina58091167), 2022-08-27
Supplement: s1 [file s1]

Online supplementary Table S1 Differences between empagliflozin and dapagliflozin allocated patients across baseline characteristics.

| <b>Baseline<br/>Characteristic</b>            | <b>Empagliflozin</b> | <b>Dapagliflozin</b> | <b>Empagliflozin<br/>vs. dapagliflozin<br/>p value</b> |
|-----------------------------------------------|----------------------|----------------------|--------------------------------------------------------|
| <b>Age (years)</b>                            | 60.25 ± 8.83         | 64.3 ± 8.16          | 0.58                                                   |
| <b>Type 2 diabetes<br/>duration (years)</b>   | 9.18 ± 6.28          | 10 ± 6.5             | 0.65                                                   |
| <b>Body mass<br/>index (kg/m<sup>2</sup>)</b> | 32.73 ± 5.52         | 32.6 ± 5.89          | 0.69                                                   |
| <b>Glycated<br/>hemoglobin (%)</b>            | 7.69 ± 1.77          | 7.36 ± 1.37          | 0.65                                                   |
| <b>Cardiovascular<br/>disease</b>             | 9 (56.25%)           | 17 (56.67%)          | 0.17                                                   |
| <b>Hypertension</b>                           | 12 (75%)             | 20 (66.67%)          | 0.61                                                   |
| <b>Coronary<br/>artery disease</b>            | 5 (31.25%)           | 9 (30%)              | 0.35                                                   |
| <b>Heart failure</b>                          | 1 (6.25%)            | 4 (13.33%)           | 0.12                                                   |
| <b>Cerebrovascul<br/>ar disease</b>           | 2 (12.5%)            | 5 (16.67%)           | 0.99                                                   |
| <b>Dyslipidemia</b>                           | 12 (75%)             | 16 (53.33%)          | 0.37                                                   |
| <b>Metformin</b>                              | 15 (93.75%)          | 28 (93.33%)          | 0.52                                                   |
| <b>Insulin</b>                                | 6 (37.5%)            | 7 (23.33%)           | 0.29                                                   |
| <b>GLP-1<br/>receptor agonists</b>            | 7 (43.75%)           | 8 (26.67%)           | 0.99                                                   |
| <b>DPP-4<br/>inhibitors</b>                   | 6 (37.5%)            | 12 (40%)             | 0.64                                                   |
| <b>Sulphonylureas</b>                         | 3 (18.75%)           | 3 (10%)              | 0.009                                                  |
| <b>RAAS blockers</b>                          | 12 (75%)             | 17 (56.67%)          | 0.61                                                   |
| <b>Calcium<br/>channel blockers</b>           | 5 (31.25%)           | 8 (26.67%)           | 0.99                                                   |
| <b>Diuretics</b>                              | 4 (25%)              | 14 (46.67%)          | 0.99                                                   |
| <b>B-blockers</b>                             | 7 (43.75%)           | 11 (36.67%)          | 0.64                                                   |
| <b>Antiplatelet<br/>agents</b>                | 11 (68.75%)          | 13 (43.33%)          | 0.33                                                   |

|                |            |             |       |
|----------------|------------|-------------|-------|
| <b>Statins</b> | 14 (87.5%) | 17 (56.67%) | 0.052 |
|----------------|------------|-------------|-------|
